## **ENZYMMap: Exploiting protein annotation for modeling and predicting EC number changes in UniProt/Swiss-Prot**

Sabrina de Azevedo Silveira<sup>1,2\*</sup>, Raquel Cardoso de Melo-Minardi<sup>1</sup>, Carlos Henrique da Silveira<sup>3</sup>, Marcelo Matos Santoro<sup>2</sup>, Wagner Meira Jr<sup>1\*</sup>

**1 Department of Computer Science, Universidade Federal de Minas Gerais, Belo Horizonte, Minas Gerais, Brazil**

**2 Department of Biochemistry and Immunology, Universidade Federal de Minas Gerais, Belo Horizonte, Minas Gerais, Brazil**

**3 Department of Biotechnology, Universidade Federal da Paraíba, João Pessoa, Paraíba, Brazil**

\* E-mail: [sabrinas@dcc.ufmg.br](mailto:sabrinas@dcc.ufmg.br), [meira@dcc.ufmg.br](mailto:meira@dcc.ufmg.br)

### **Supporting material S1**

Availability: [www.dcc.ufmg.br/~sabrinas/enzymap](http://www.dcc.ufmg.br/~sabrinas/enzymap)

#### **Figure S1 - Statistics about UniProt/Swiss-Prot releases.**

These graphs refer to Table S1. (a) Total number of entries and number of entries with EC number. (b) Percentage of entries with EC number.

(a)

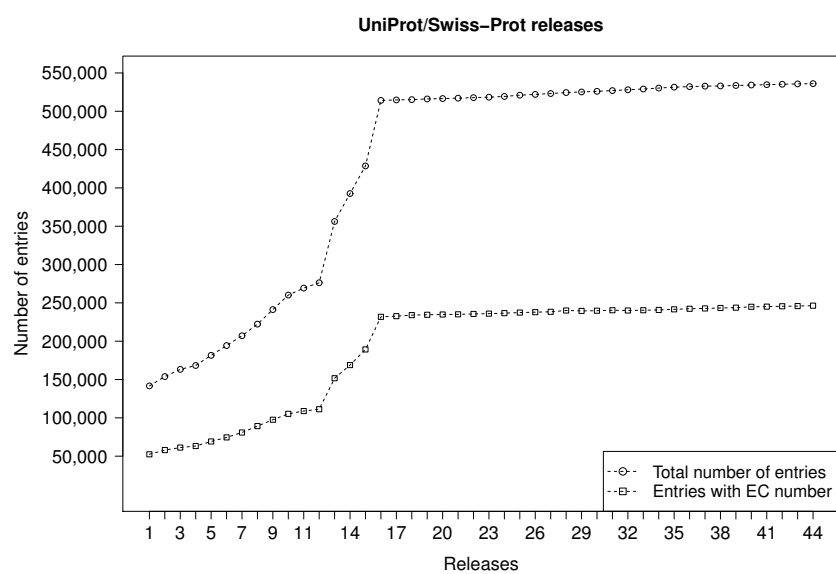

(b)

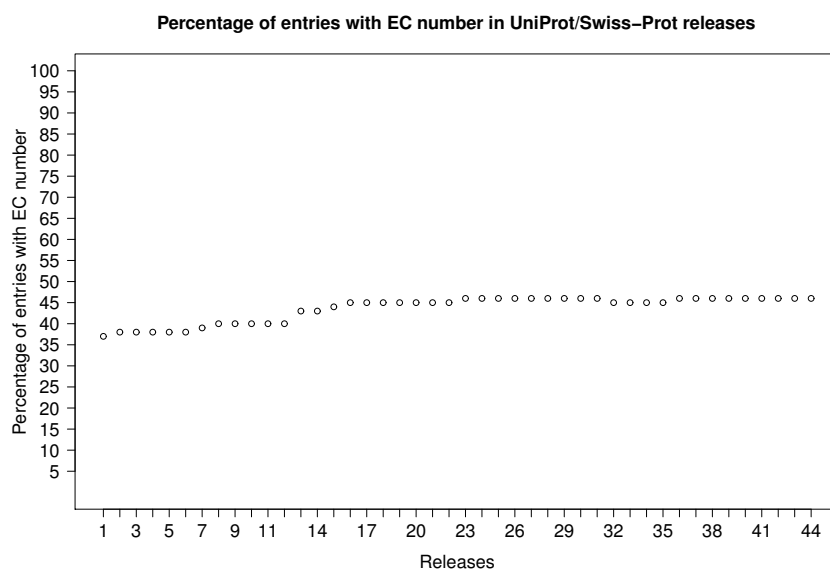

**Figure S2 - Statistics about UniProt/Swiss-Prot pairs of releases.**

These graphs refer to Table S2. (a) Number of entries in the set intersection of each release pair. (b) Percentage of entries in the set intersection of each release pair.

(a)

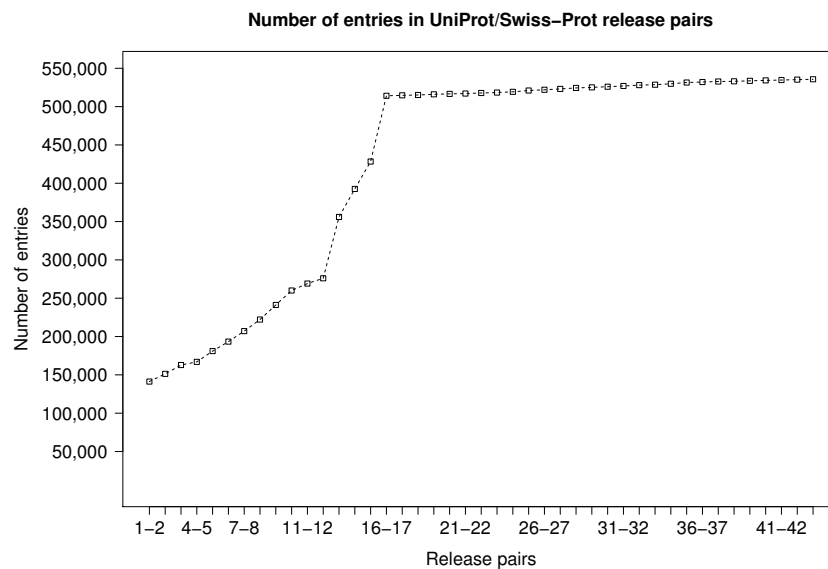

(b)

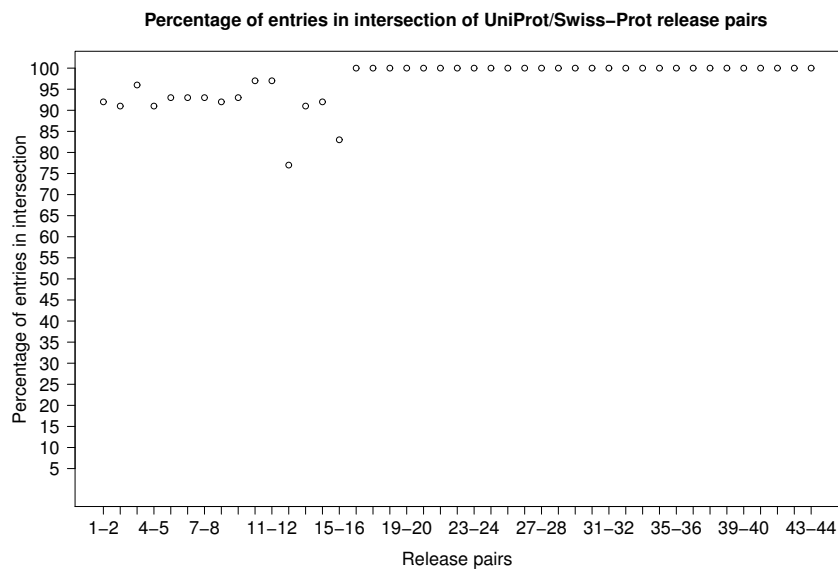

### Figure S3 - Number of EC change types used and discarded.

EC change types with at least ten examples throughout all UniProt/Swiss-Prot releases were used in this study. Discarded and used types of EC changes in each release are presented in this figure.

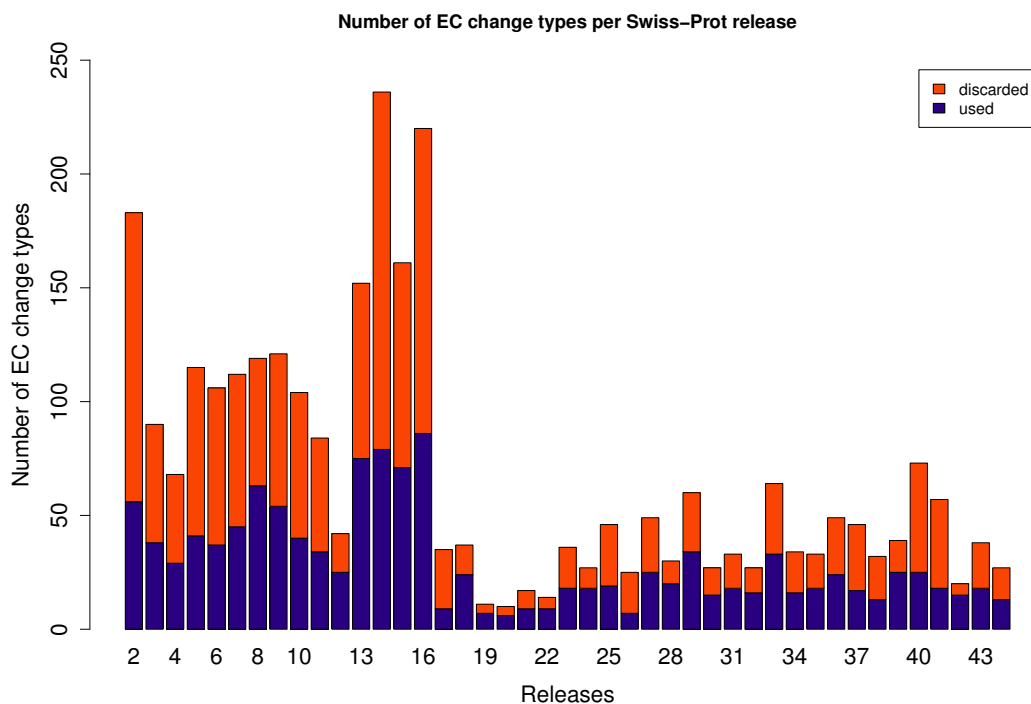

### Figure S4 - Number of EC change examples for all EC change types.

The number of EC change examples is presented in x axis and the number of EC change types is presented in y axis. In (a) the histogram represents the number of EC change examples for all 508 EC change types; in (b) only changes with less than 200 examples are presented and in (c), changes with less than 100 examples. The upper limit chosen for instances in control set was 27, which is the median of the number of EC change examples. It is more representative for the number of examples than the mean, which is 102.2 with standard deviation 224.6.

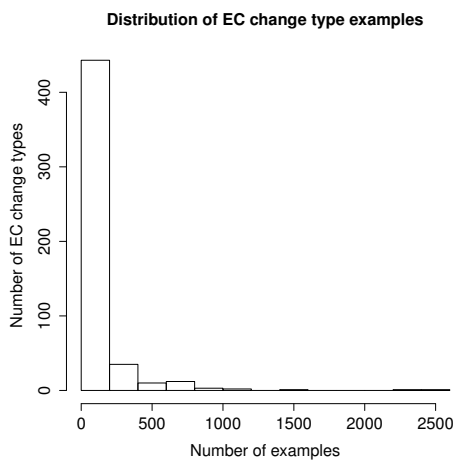

(a)

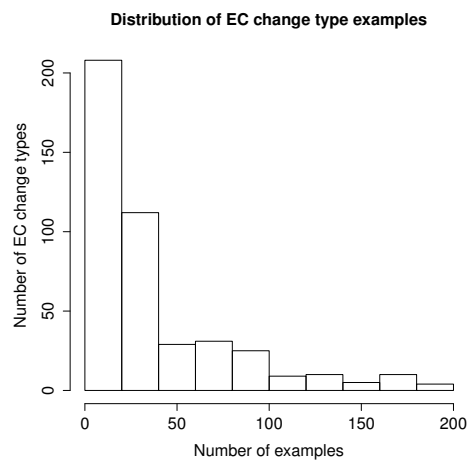

(b)

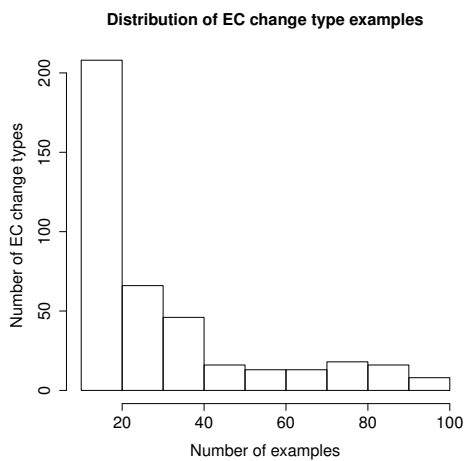

(c)

**Figure S5 - Classification task flowchart.**

This classification task flowchart represents the three types of experiments performed to characterize and predict the EC number changes: Descriptive multiclass, Predictive multiclass and Predictive common source.

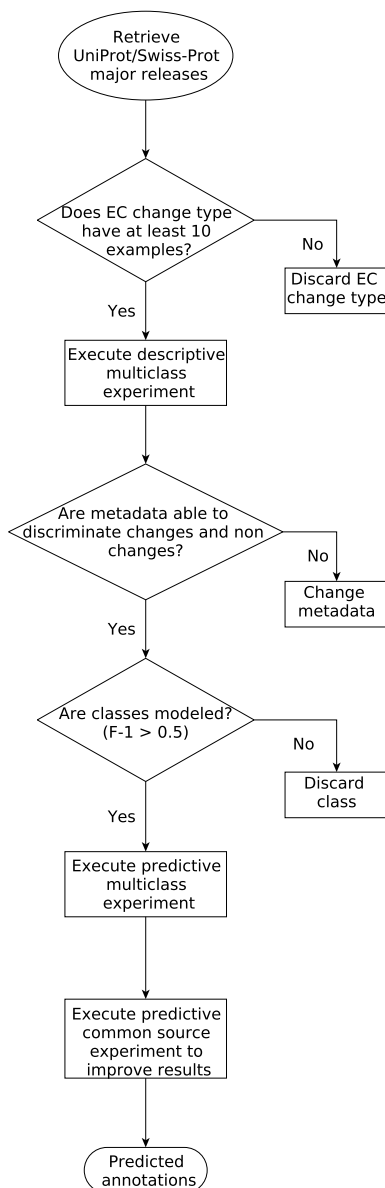

### Figure S6 - Changes in KW line type and EC number.

The 44 releases of UniProt/Swiss-Prot were analyzed to check if changes in KW line type occur at the same time as changes in EC number annotation. An example of the data generated to perform this analysis is provided in Table S16. Orange represents instances in which EC number and KW changed at the same time; yellow indicates instances in which EC number and KW did not change (both stayed the same) and instances in which EC number and KW differ (one of them changed and the other did not) are depicted in black. A total of 18,727,155 records (or instances) of changes and non-changes were observed. Among those, there are 55,908 EC number changes and 1,074,763 KW changes. As the number of records in which neither EC number nor KW changed differs by orders of magnitude from the number of registers that represents change in EC or KW, random samples were obtained to perform a fair comparison. In (a), KW is used as reference, so all instances (1,074,763) in which KW line type changed were collected and a random sample of the same size was generated from instances in which KW did not change. In 1% of instances EC and KW changed at the same time (orange) and in 49% of instances EC and KW differed (depicted in black). In (b), EC is used as reference, so all instances (55,908) in which EC number changed were collected and a random sample of the same size was generated from instances in which EC number did not change. EC and KW changed at the same time in 23% of instances (orange), while in 30% of instances they differed (black). The quantitative results are presented in Table S17. These graphs indicate that a change in EC number implies in a change in KW, in Figure (b) in orange, more than a change in KW implies in a change in EC number, Figure (a) in orange. Figures (a) and (b) indicates that although there is some correlation between EC number and KW changes, in a significant amount of data they change separately (depicted in black).

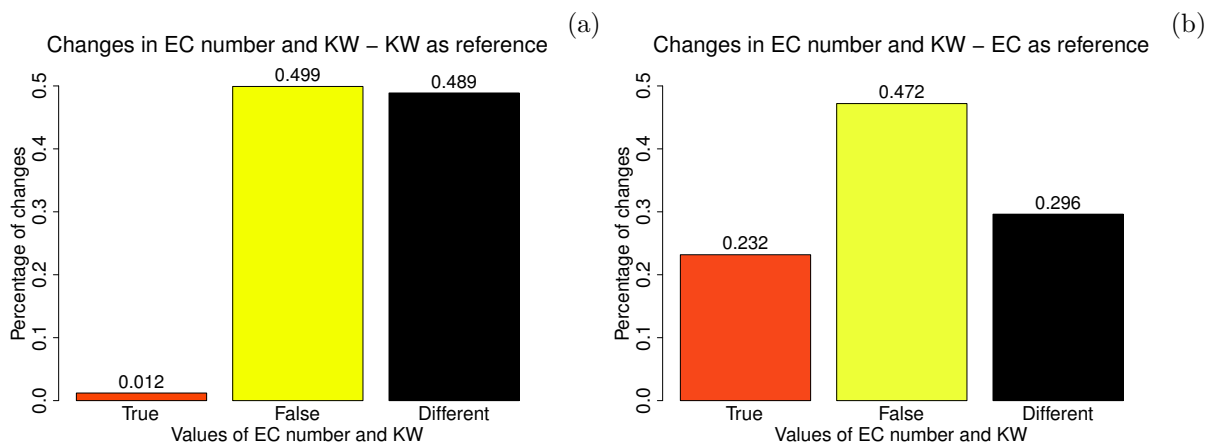

**Table S1 - Releases 1 to 44 of UniProt/Swiss-Prot.**

This table provides, for each release used in this study, the date in which the release was launched, percentage and number of entries with EC number and total number of entries.

| Release index | Release name | Release date<br>(MM/DD/YYYY) | % of entries<br>with EC | Number of entries<br>with EC | Total number<br>of entries |
|---------------|--------------|------------------------------|-------------------------|------------------------------|----------------------------|
| 1             | 1            | 12/15/2003                   | 37                      | 52,434                       | 141,681                    |
| 2             | 2            | 07/05/2004                   | 38                      | 57,931                       | 153,871                    |
| 3             | 3            | 10/25/2004                   | 38                      | 61,229                       | 163,235                    |
| 4             | 4            | 02/01/2005                   | 38                      | 63,221                       | 168,297                    |
| 5             | 5            | 05/10/2005                   | 38                      | 69,164                       | 181,571                    |
| 6             | 6            | 09/13/2005                   | 38                      | 74,468                       | 194,317                    |
| 7             | 7            | 02/07/2006                   | 39                      | 80,874                       | 207,132                    |
| 8             | 8            | 05/30/2006                   | 40                      | 89,245                       | 222,289                    |
| 9             | 9            | 10/31/2006                   | 40                      | 97,508                       | 241,242                    |
| 10            | 10           | 03/06/2007                   | 40                      | 105,225                      | 260,175                    |
| 11            | 11           | 05/29/2007                   | 40                      | 108,876                      | 269,293                    |
| 12            | 12           | 07/24/2007                   | 40                      | 111,230                      | 276,256                    |
| 13            | 13           | 02/26/2008                   | 43                      | 151,694                      | 356,194                    |
| 14            | 14           | 07/22/2008                   | 43                      | 168,849                      | 392,667                    |
| 15            | 15           | 03/24/2009                   | 44                      | 189,234                      | 428,650                    |
| 16            | 2010.01      | 01/19/2010                   | 45                      | 231,776                      | 514,212                    |
| 17            | 2010.02      | 02/09/2010                   | 45                      | 232,662                      | 514,789                    |
| 18            | 2010.03      | 03/02/2010                   | 45                      | 234,040                      | 515,203                    |
| 19            | 2010.04      | 03/23/2010                   | 45                      | 234,494                      | 516,081                    |
| 20            | 2010.05      | 04/20/2010                   | 45                      | 234,843                      | 516,603                    |
| 21            | 2010.06      | 05/18/2010                   | 45                      | 235,081                      | 517,100                    |
| 22            | 2010.07      | 06/15/2010                   | 45                      | 235,561                      | 517,802                    |
| 23            | 2010.08      | 07/13/2010                   | 46                      | 235,952                      | 518,415                    |
| 24            | 2010.09      | 08/10/2010                   | 46                      | 236,597                      | 519,348                    |
| 25            | 2010.10      | 10/05/2010                   | 46                      | 237,361                      | 521,016                    |
| 26            | 2010.11      | 11/02/2010                   | 46                      | 237,872                      | 522,019                    |
| 27            | 2010.12      | 11/30/2010                   | 46                      | 238,344                      | 523,151                    |
| 28            | 2011.01      | 01/11/2011                   | 46                      | 240,052                      | 524,420                    |
| 29            | 2011.02      | 02/08/2011                   | 46                      | 239,545                      | 525,207                    |
| 30            | 2011.03      | 03/08/2011                   | 46                      | 239,775                      | 525,997                    |
| 31            | 2011.04      | 04/05/2011                   | 46                      | 240,406                      | 526,969                    |
| 32            | 2011.05      | 05/03/2011                   | 45                      | 240,055                      | 528,048                    |
| 33            | 2011.06      | 05/31/2011                   | 45                      | 240,374                      | 529,056                    |
| 34            | 2011.07      | 06/28/2011                   | 45                      | 240,787                      | 530,264                    |
| 35            | 2011.08      | 07/27/2011                   | 45                      | 241,578                      | 531,473                    |
| 36            | 2011.09      | 09/21/2011                   | 46                      | 242,309                      | 532,146                    |
| 37            | 2011.10      | 10/19/2011                   | 46                      | 242,742                      | 532,792                    |
| 38            | 2011.11      | 11/16/2011                   | 46                      | 243,333                      | 533,049                    |
| 39            | 2011.12      | 12/14/2011                   | 46                      | 243,749                      | 533,657                    |
| 40            | 2012.01      | 01/25/2012                   | 46                      | 244,898                      | 534,242                    |
| 41            | 2012.02      | 02/22/2012                   | 46                      | 245,113                      | 534,695                    |
| 42            | 2012.03      | 03/21/2012                   | 46                      | 245,566                      | 535,248                    |
| 43            | 2012.04      | 04/18/2012                   | 46                      | 245,826                      | 535,698                    |
| 44            | 2012.05      | 05/16/2012                   | 46                      | 246,347                      | 536,029                    |

**Table S2 - Release pairs and number of entries in the intersection.**

This table provides the number of entries in the set intersection of each UniProt/Swiss-Prot release pair.

| Release pair | Number of entries in $\cap$ |
|--------------|-----------------------------|
| 1-2          | 141,249                     |
| 2-3          | 151,318                     |
| 3-4          | 162,812                     |
| 4-5          | 166,933                     |
| 5-6          | 181,005                     |
| 6-7          | 193,382                     |
| 7-8          | 207,069                     |
| 8-9          | 222,181                     |
| 9-10         | 241,189                     |
| 10-11        | 260,065                     |
| 11-12        | 269,152                     |
| 12-13        | 276,011                     |
| 13-14        | 356,036                     |
| 14-15        | 392,597                     |
| 15-16        | 428,331                     |
| 16-17        | 514,121                     |
| 17-18        | 514,740                     |
| 18-19        | 515,180                     |
| 19-20        | 516,049                     |
| 20-21        | 516,593                     |
| 21-22        | 517,045                     |
| 22-23        | 517,769                     |
| 23-24        | 518,350                     |
| 24-25        | 519,302                     |
| 25-26        | 521,007                     |
| 26-27        | 522,001                     |
| 27-28        | 523,101                     |
| 28-29        | 524,367                     |
| 29-30        | 525,107                     |
| 30-31        | 525,960                     |
| 31-32        | 526,934                     |
| 32-33        | 528,024                     |
| 33-34        | 528,573                     |
| 34-35        | 529,826                     |
| 35-36        | 531,443                     |
| 36-37        | 532,076                     |
| 37-38        | 532,780                     |
| 38-39        | 533,028                     |
| 39-40        | 533,643                     |
| 40-41        | 534,227                     |
| 41-42        | 534,678                     |
| 42-43        | 535,207                     |
| 43-44        | 535,682                     |

**Table S3 - Example of EC number changes across consecutive UniProt/Swiss-Prot releases and our prefix/generalization/specialization model.**

Common prefix length refers to the number of levels that remained the same from left to right; the number of generalizations and specializations represent the number of deleted and added levels, respectively.

| Previous EC number | Current EC number | UniProt id | Releases | Common prefix length | Degrees of generalization | Degrees of specialization |
|--------------------|-------------------|------------|----------|----------------------|---------------------------|---------------------------|
| -.-.-              | -.-.-             | Q9K5T1     | 1-2      | 0                    | 0                         | 0                         |
| 3.1.4.14           | 1.7.-.-           | P41407     | 7-8      | 0                    | 4                         | 2                         |
| 1.1.1.-            | 1.-.-             | P52895     | 5-6      | 1                    | 2                         | 0                         |
| 5.3.-.-            | 5.3.1.27          | P42404     | 14-15    | 2                    | 0                         | 2                         |
| 2.5.1.64           | 2.5.1.-           | P17109     | 13-14    | 3                    | 1                         | 0                         |
| 4.1.1.22           | 4.1.1.22          | P95477     | 1-2      | 4                    | 0                         | 0                         |

### Text S1 - Descriptive Multiclass Experiment.

This experiment was performed in three different configurations regarding text preprocessing tasks n-grams and stemmer: (1) neither n-grams or stemmer were used; (2) just stemmer was used; (3) both n-grams and stemmer were used. The purpose of using these different configurations was to check which one was able to generate the best classification model and use the best configuration in subsequent predictive experiments.

The configuration with n-gram and without stemmer was not performed due to hardware constraints. As the occurrence matrix (detailed in Section *Generation of occurrence matrix* from our paper) for this configuration was the larger one (3.8 GB), the used machine ran out of RAM memory. This matrix is large because stemmer technique, which would reduce the number of features mapping inflected words to their stem, was not applied.

The results are presented in Tables S4 (Neither n-grams or stemmer were used), S5 (just stemmer was used) and S6 (both n-grams and stemmer were used). Table S7 summarizes the results. The configuration (3), in which both n-gram and stemmer were applied, is slightly better than the others, thus in predictive experiments this was the chosen configuration.

**Table S4 - Results for configuration 1: occurrence matrix generated using neither n-grams or stemmer.**

| Technique   | Votes    | Maximum          | Features  | TPR          | FPR          | Precision    | Recall       | $F_1$        | AUC          |
|-------------|----------|------------------|-----------|--------------|--------------|--------------|--------------|--------------|--------------|
| Naïve Bayes | 1        | TPR              | 93        | 0.494        | 0.004        | 0.672        | 0.494        | 0.526        | 0.927        |
|             | 0        | FPR              | 1         | 0.255        | 0.255        | 0.065        | 0.255        | 0.104        | 0.715        |
|             | 1        | Precision        | 93        | 0.494        | 0.004        | 0.672        | 0.494        | 0.526        | 0.927        |
|             | 1        | Recall           | 93        | 0.494        | 0.004        | 0.672        | 0.494        | 0.526        | 0.927        |
|             | 1        | $F_1$            | 93        | 0.494        | 0.004        | 0.672        | 0.494        | 0.526        | 0.927        |
|             | <b>1</b> | <b>AUC</b>       | <b>82</b> | <b>0.481</b> | <b>0.004</b> | <b>0.662</b> | <b>0.481</b> | <b>0.511</b> | <b>0.928</b> |
| KNN_K1      | <b>2</b> | <b>TPR</b>       | <b>99</b> | <b>0.741</b> | <b>0.005</b> | <b>0.74</b>  | <b>0.741</b> | <b>0.738</b> | <b>0.952</b> |
|             | 0        | FPR              | 1         | 0.559        | 0.008        | 0.545        | 0.559        | 0.55         | 0.901        |
|             | <b>2</b> | <b>Precision</b> | <b>99</b> | <b>0.741</b> | <b>0.005</b> | <b>0.74</b>  | <b>0.741</b> | <b>0.738</b> | <b>0.952</b> |
|             | <b>2</b> | <b>Recall</b>    | <b>99</b> | <b>0.741</b> | <b>0.005</b> | <b>0.74</b>  | <b>0.741</b> | <b>0.738</b> | <b>0.952</b> |
|             | <b>2</b> | $F_1$            | <b>99</b> | <b>0.741</b> | <b>0.005</b> | <b>0.74</b>  | <b>0.741</b> | <b>0.738</b> | <b>0.952</b> |
|             | 1        | AUC              | 94        | 0.74         | 0.005        | 0.739        | 0.74         | 0.737        | 0.952        |
| KNN_K3      | <b>2</b> | <b>TPR</b>       | <b>90</b> | <b>0.713</b> | <b>0.009</b> | <b>0.705</b> | <b>0.713</b> | <b>0.703</b> | <b>0.963</b> |
|             | 0        | FPR              | 1         | 0.487        | 0.017        | 0.458        | 0.487        | 0.466        | 0.887        |
|             | 1        | Precision        | 97        | 0.712        | 0.009        | 0.705        | 0.712        | 0.702        | 0.963        |
|             | <b>2</b> | <b>Recall</b>    | <b>90</b> | <b>0.713</b> | <b>0.009</b> | <b>0.705</b> | <b>0.713</b> | <b>0.703</b> | <b>0.963</b> |
|             | <b>2</b> | $F_1$            | <b>90</b> | <b>0.713</b> | <b>0.009</b> | <b>0.705</b> | <b>0.713</b> | <b>0.703</b> | <b>0.963</b> |
|             | 1        | AUC              | 97        | 0.712        | 0.009        | 0.705        | 0.712        | 0.702        | 0.963        |
| KNN_K5      | 0        | TPR              | 100       | 0.701        | 0.013        | 0.684        | 0.701        | 0.683        | 0.965        |
|             | 0        | FPR              | 1         | 0.46         | 0.024        | 0.41         | 0.46         | 0.428        | 0.879        |
|             | 0        | Precision        | 100       | 0.701        | 0.013        | 0.684        | 0.701        | 0.683        | 0.965        |
|             | 0        | Recall           | 100       | 0.701        | 0.013        | 0.684        | 0.701        | 0.683        | 0.965        |
|             | <b>2</b> | $F_1$            | <b>95</b> | <b>0.701</b> | <b>0.013</b> | <b>0.683</b> | <b>0.701</b> | <b>0.684</b> | <b>0.966</b> |
|             | <b>2</b> | <b>AUC</b>       | <b>95</b> | <b>0.701</b> | <b>0.013</b> | <b>0.683</b> | <b>0.701</b> | <b>0.684</b> | <b>0.966</b> |
| KNN_K7      | 1        | TPR              | 48        | 0.691        | 0.015        | 0.667        | 0.691        | 0.669        | 0.966        |
|             |          | FPR              | 1         | 0.44         | 0.031        | 0.376        | 0.44         | 0.4          | 0.873        |
|             | 1        | Precision        | 64        | 0.691        | 0.016        | 0.669        | 0.691        | 0.669        | 0.966        |
|             | 1        | Recall           | 48        | 0.691        | 0.015        | 0.667        | 0.691        | 0.669        | 0.966        |
|             | <b>2</b> | $F_1$            | <b>55</b> | <b>0.691</b> | <b>0.016</b> | <b>0.667</b> | <b>0.691</b> | <b>0.67</b>  | <b>0.966</b> |
|             | 1        | AUC              | 79        | 0.689        | 0.016        | 0.666        | 0.689        | 0.667        | 0.966        |
| KNN_K10     | 1        | TPR              | 54        | 0.676        | 0.020        | 0.644        | 0.676        | 0.648        | 0.967        |
|             |          | FPR              | 1         | 0.419        | 0.040        | 0.341        | 0.419        | 0.369        | 0.866        |
|             |          | Precision        | 86        | 0.676        | 0.022        | 0.647        | 0.676        | 0.647        | 0.966        |
|             | 1        | Recall           | 54        | 0.676        | 0.020        | 0.644        | 0.676        | 0.648        | 0.967        |
|             | <b>2</b> | $F_1$            | <b>21</b> | <b>0.676</b> | <b>0.018</b> | <b>0.640</b> | <b>0.676</b> | <b>0.649</b> | <b>0.967</b> |
|             | 1        | AUC              | 46        | 0.675        | 0.020        | 0.642        | 0.675        | 0.647        | 0.967        |
| J48         | <b>2</b> | <b>TPR</b>       | <b>88</b> | <b>0.744</b> | <b>0.006</b> | <b>0.732</b> | <b>0.744</b> | <b>0.733</b> | <b>0.937</b> |
|             |          | FPR              | 1         | 0.498        | 0.014        | 0.468        | 0.498        | 0.479        | 0.831        |
|             | 1        | Precision        | 90        | 0.743        | 0.006        | 0.732        | 0.743        | 0.732        | 0.937        |
|             | <b>2</b> | <b>Recall</b>    | <b>88</b> | <b>0.744</b> | <b>0.006</b> | <b>0.732</b> | <b>0.744</b> | <b>0.733</b> | <b>0.937</b> |
|             | <b>2</b> | $F_1$            | <b>88</b> | <b>0.744</b> | <b>0.006</b> | <b>0.732</b> | <b>0.744</b> | <b>0.733</b> | <b>0.937</b> |
|             | 1        | AUC              | 85        | 0.743        | 0.006        | 0.731        | 0.743        | 0.732        | 0.937        |

**Table S5 - Results for configuration 2: occurrence matrix generated using just stemmer.**

| Technique   | Votes    | Maximum          | Features  | TPR          | FPR          | Precision    | Recall       | $F_1$        | AUC          |
|-------------|----------|------------------|-----------|--------------|--------------|--------------|--------------|--------------|--------------|
| Naïve Bayes | 0        | TPR              | 99        | 0.492        | 0.004        | 0.67         | 0.492        | 0.523        | 0.927        |
|             | 0        | FPR              | 1         | 0.255        | 0.255        | 0.065        | 0.255        | 0.104        | 0.715        |
|             | 0        | Precision        | 94        | 0.491        | 0.004        | 0.671        | 0.491        | 0.523        | 0.927        |
|             | 1        | Recall           | 99        | 0.492        | 0.004        | 0.67         | 0.492        | 0.523        | 0.927        |
|             | 1        | $F_1$            | 100       | 0.492        | 0.004        | 0.671        | 0.492        | 0.524        | 0.926        |
|             | <b>0</b> | <b>AUC</b>       | <b>89</b> | <b>0.491</b> | <b>0.004</b> | <b>0.671</b> | <b>0.491</b> | <b>0.523</b> | <b>0.928</b> |
| KNN_K1      | 1        | TPR              | 97        | 0.741        | 0.005        | 0.739        | 0.741        | 0.737        | 0.952        |
|             | 0        | FPR              | 1         | 0.559        | 0.008        | 0.546        | 0.559        | 0.551        | 0.901        |
|             | 1        | Precision        | 92        | 0.74         | 0.005        | 0.739        | 0.74         | 0.737        | 0.952        |
|             | 1        | Recall           | 97        | 0.741        | 0.005        | 0.739        | 0.741        | 0.737        | 0.952        |
|             | <b>2</b> | $F_1$            | <b>98</b> | <b>0.741</b> | <b>0.005</b> | <b>0.739</b> | <b>0.741</b> | <b>0.738</b> | <b>0.952</b> |
|             | 1        | AUC              | 82        | 0.739        | 0.005        | 0.738        | 0.739        | 0.736        | 0.952        |
| KNN_K3      | <b>2</b> | <b>TPR</b>       | <b>90</b> | <b>0.713</b> | <b>0.009</b> | <b>0.706</b> | <b>0.713</b> | <b>0.703</b> | <b>0.963</b> |
|             | 0        | FPR              | 1         | 0.486        | 0.016        | 0.457        | 0.486        | 0.465        | 0.887        |
|             | <b>2</b> | <b>Precision</b> | <b>90</b> | <b>0.713</b> | <b>0.009</b> | <b>0.706</b> | <b>0.713</b> | <b>0.703</b> | <b>0.963</b> |
|             | <b>2</b> | <b>Recall</b>    | <b>90</b> | <b>0.713</b> | <b>0.009</b> | <b>0.706</b> | <b>0.713</b> | <b>0.703</b> | <b>0.963</b> |
|             | <b>2</b> | $F_1$            | <b>90</b> | <b>0.713</b> | <b>0.009</b> | <b>0.706</b> | <b>0.713</b> | <b>0.703</b> | <b>0.963</b> |
|             | 1        | AUC              | 84        | 0.712        | 0.009        | 0.705        | 0.712        | 0.702        | 0.963        |
| KNN_K5      | 1        | TPR              | 91        | 0.701        | 0.013        | 0.683        | 0.701        | 0.683        | 0.966        |
|             | 0        | FPR              | 1         | 0.46         | 0.023        | 0.411        | 0.46         | 0.429        | 0.879        |
|             | 1        | Precision        | 95        | 0.701        | 0.013        | 0.684        | 0.701        | 0.684        | 0.966        |
|             | 1        | Recall           | 91        | 0.701        | 0.013        | 0.683        | 0.701        | 0.683        | 0.966        |
|             | <b>1</b> | $F_1$            | <b>48</b> | <b>0.701</b> | <b>0.012</b> | <b>0.683</b> | <b>0.701</b> | <b>0.685</b> | <b>0.965</b> |
|             | 1        | AUC              | 91        | 0.701        | 0.013        | 0.683        | 0.701        | 0.683        | 0.966        |
| KNN_K7      | 1        | TPR              | 53        | 0.691        | 0.016        | 0.666        | 0.691        | 0.669        | 0.966        |
|             | 0        | FPR              | 1         | 0.441        | 0.03         | 0.378        | 0.441        | 0.401        | 0.874        |
|             | 1        | Precision        | 100       | 0.691        | 0.017        | 0.668        | 0.691        | 0.668        | 0.966        |
|             | 1        | Recall           | 53        | 0.691        | 0.016        | 0.666        | 0.691        | 0.669        | 0.966        |
|             | <b>2</b> | $F_1$            | <b>55</b> | <b>0.691</b> | <b>0.016</b> | <b>0.667</b> | <b>0.691</b> | <b>0.67</b>  | <b>0.966</b> |
|             | 1        | AUC              | 53        | 0.691        | 0.016        | 0.666        | 0.691        | 0.669        | 0.966        |
| KNN_K10     | 0        | TPR              | 86        | 0.677        | 0.022        | 0.646        | 0.677        | 0.647        | 0.966        |
|             | 0        | FPR              | 1         | 0.419        | 0.040        | 0.341        | 0.419        | 0.369        | 0.866        |
|             | 0        | Precision        | 85        | 0.676        | 0.022        | 0.647        | 0.676        | 0.647        | 0.966        |
|             | 0        | Recall           | 86        | 0.677        | 0.022        | 0.646        | 0.677        | 0.647        | 0.966        |
|             | <b>1</b> | $F_1$            | <b>22</b> | <b>0.676</b> | <b>0.018</b> | <b>0.64</b>  | <b>0.676</b> | <b>0.649</b> | <b>0.967</b> |
|             | 1        | AUC              | 48        | 0.676        | 0.020        | 0.643        | 0.676        | 0.648        | 0.968        |
| J48         | 1        | TPR              | 90        | 0.742        | 0.006        | 0.731        | 0.742        | 0.731        | 0.936        |
|             | 0        | FPR              | 1         | 0.498        | 0.013        | 0.469        | 0.498        | 0.479        | 0.831        |
|             | 1        | Precision        | 90        | 0.742        | 0.006        | 0.731        | 0.742        | 0.731        | 0.936        |
|             | 1        | Recall           | 90        | 0.742        | 0.006        | 0.731        | 0.742        | 0.731        | 0.936        |
|             | 1        | $F_1$            | 90        | 0.742        | 0.006        | 0.731        | 0.742        | 0.731        | 0.936        |
|             | <b>1</b> | <b>AUC</b>       | <b>61</b> | <b>0.741</b> | <b>0.006</b> | <b>0.729</b> | <b>0.741</b> | <b>0.729</b> | <b>0.937</b> |

**Table S6 - Results for configuration 3: occurrence matrix generated using both n-grams and stemmer.**

| Technique   | Votes    | Maximum          | Features   | TPR          | FPR          | Precision    | Recall       | $F_1$        | AUC          |
|-------------|----------|------------------|------------|--------------|--------------|--------------|--------------|--------------|--------------|
| Naïve Bayes | <b>2</b> | <b>TPR</b>       | <b>97</b>  | <b>0.507</b> | <b>0.005</b> | <b>0.672</b> | <b>0.507</b> | <b>0.534</b> | <b>0.929</b> |
|             | 0        | FPR              | 1          | 0.255        | 0.255        | 0.065        | 0.255        | 0.104        | 0.715        |
|             | 1        | Precision        | 100        | 0.505        | 0.005        | 0.672        | 0.505        | 0.532        | 0.929        |
|             | <b>2</b> | <b>Recall</b>    | <b>97</b>  | <b>0.507</b> | <b>0.005</b> | <b>0.672</b> | <b>0.507</b> | <b>0.534</b> | <b>0.929</b> |
|             | <b>2</b> | $F_1$            | <b>97</b>  | <b>0.507</b> | <b>0.005</b> | <b>0.672</b> | <b>0.507</b> | <b>0.534</b> | <b>0.929</b> |
|             | 1        | AUC              | 90         | 0.499        | 0.004        | 0.667        | 0.499        | 0.525        | 0.929        |
|             |          |                  |            |              |              |              |              |              |              |
| KNN_K1      | 1        | TPR              | 95         | 0.744        | 0.005        | 0.741        | 0.744        | 0.74         | 0.952        |
|             | 0        | FPR              | 1          | 0.567        | 0.008        | 0.554        | 0.567        | 0.559        | 0.903        |
|             | 1        | Precision        | 97         | 0.744        | 0.005        | 0.742        | 0.744        | 0.74         | 0.952        |
|             | 1        | Recall           | 95         | 0.744        | 0.005        | 0.741        | 0.744        | 0.74         | 0.952        |
|             | 1        | $F_1$            | 95         | 0.744        | 0.005        | 0.741        | 0.744        | 0.74         | 0.952        |
|             | <b>1</b> | <b>AUC</b>       | <b>38</b>  | <b>0.741</b> | <b>0.005</b> | <b>0.739</b> | <b>0.741</b> | <b>0.738</b> | <b>0.953</b> |
|             |          |                  |            |              |              |              |              |              |              |
| KNN_K3      | 1        | TPR              | 29         | 0.718        | 0.009        | 0.709        | 0.718        | 0.709        | 0.962        |
|             | 0        | FPR              | 1          | 0.495        | 0.016        | 0.467        | 0.495        | 0.475        | 0.891        |
|             | <b>2</b> | <b>Precision</b> | <b>100</b> | <b>0.718</b> | <b>0.009</b> | <b>0.712</b> | <b>0.718</b> | <b>0.709</b> | <b>0.963</b> |
|             | 1        | Recall           | 29         | 0.718        | 0.009        | 0.709        | 0.718        | 0.709        | 0.962        |
|             | 1        | $F_1$            | 29         | 0.718        | 0.009        | 0.709        | 0.718        | 0.709        | 0.962        |
|             | 1        | AUC              | 86         | 0.716        | 0.009        | 0.709        | 0.716        | 0.707        | 0.963        |
|             |          |                  |            |              |              |              |              |              |              |
| KNN_K5      | 1        | TPR              | 95         | 0.711        | 0.013        | 0.696        | 0.711        | 0.695        | 0.966        |
|             | 0        | FPR              | 1          | 0.468        | 0.024        | 0.421        | 0.468        | 0.438        | 0.884        |
|             | <b>2</b> | <b>Precision</b> | <b>100</b> | <b>0.711</b> | <b>0.013</b> | <b>0.697</b> | <b>0.711</b> | <b>0.696</b> | <b>0.966</b> |
|             | 1        | Recall           | 95         | 0.711        | 0.013        | 0.696        | 0.711        | 0.695        | 0.966        |
|             | <b>2</b> | $F_1$            | <b>100</b> | <b>0.711</b> | <b>0.013</b> | <b>0.697</b> | <b>0.711</b> | <b>0.696</b> | <b>0.966</b> |
|             | 1        | AUC              | 95         | 0.711        | 0.013        | 0.696        | 0.711        | 0.695        | 0.966        |
|             |          |                  |            |              |              |              |              |              |              |
| KNN_K7      | <b>2</b> | <b>TPR</b>       | <b>96</b>  | <b>0.702</b> | <b>0.016</b> | <b>0.683</b> | <b>0.702</b> | <b>0.682</b> | <b>0.966</b> |
|             | 0        | FPR              | 1          | 0.449        | 0.03         | 0.387        | 0.449        | 0.41         | 0.88         |
|             | <b>2</b> | <b>Precision</b> | <b>96</b>  | <b>0.702</b> | <b>0.016</b> | <b>0.683</b> | <b>0.702</b> | <b>0.682</b> | <b>0.966</b> |
|             | <b>2</b> | <b>Recall</b>    | <b>96</b>  | <b>0.702</b> | <b>0.016</b> | <b>0.683</b> | <b>0.702</b> | <b>0.682</b> | <b>0.966</b> |
|             | <b>2</b> | $F_1$            | <b>96</b>  | <b>0.702</b> | <b>0.016</b> | <b>0.683</b> | <b>0.702</b> | <b>0.682</b> | <b>0.966</b> |
|             | 1        | AUC              | 83         | 0.701        | 0.017        | 0.68         | 0.701        | 0.68         | 0.966        |
|             |          |                  |            |              |              |              |              |              |              |
| KNN_K10     | <b>1</b> | <b>TPR</b>       | <b>81</b>  | <b>0.691</b> | <b>0.022</b> | <b>0.664</b> | <b>0.691</b> | <b>0.664</b> | <b>0.966</b> |
|             | 0        | FPR              | 1          | 0.426        | 0.040        | 0.35         | 0.426        | 0.377        | 0.873        |
|             | 1        | Precision        | 97         | 0.689        | 0.022        | 0.665        | 0.689        | 0.663        | 0.967        |
|             | <b>1</b> | <b>Recall</b>    | <b>81</b>  | <b>0.691</b> | <b>0.022</b> | <b>0.664</b> | <b>0.691</b> | <b>0.664</b> | <b>0.966</b> |
|             | <b>1</b> | $F_1$            | <b>81</b>  | <b>0.691</b> | <b>0.022</b> | <b>0.664</b> | <b>0.691</b> | <b>0.664</b> | <b>0.966</b> |
|             | 1        | AUC              | 97         | 0.689        | 0.022        | 0.665        | 0.689        | 0.663        | 0.967        |
|             |          |                  |            |              |              |              |              |              |              |
| J48         | <b>2</b> | <b>TPR</b>       | <b>88</b>  | <b>0.738</b> | <b>0.006</b> | <b>0.728</b> | <b>0.738</b> | <b>0.727</b> | <b>0.934</b> |
|             | 0        | FPR              | 1          | 0.505        | 0.014        | 0.473        | 0.505        | 0.484        | 0.839        |
|             | 2        | Precision        | 97         | 0.738        | 0.006        | 0.73         | 0.738        | 0.727        | 0.934        |
|             | <b>2</b> | <b>Recall</b>    | <b>88</b>  | <b>0.738</b> | <b>0.006</b> | <b>0.728</b> | <b>0.738</b> | <b>0.727</b> | <b>0.934</b> |
|             | <b>2</b> | $F_1$            | <b>88</b>  | <b>0.738</b> | <b>0.006</b> | <b>0.728</b> | <b>0.738</b> | <b>0.727</b> | <b>0.934</b> |
|             | 2        | AUC              | 88         | 0.738        | 0.006        | 0.728        | 0.738        | 0.727        | 0.934        |

**Table S7 - Best performance of EC change prediction for each classification technique separated by configuration.**

(1) neither n-grams or stemmer were used; (2) just stemmer was used; (3) both n-grams and stemmer were used. Configuration (3) was selected as the best one and KNN\_K1 with 38 features was chosen as the best result.

| Experiment | Votes    | Technique     | Feature   | TPR          | FPR          | Precision    | Recall       | $F_1$        | AUC          |
|------------|----------|---------------|-----------|--------------|--------------|--------------|--------------|--------------|--------------|
| <b>1</b>   | 0        | Naïve Bayes   | 82        | 0.481        | 0.004        | 0.662        | 0.481        | 0.511        | 0.928        |
|            | <b>1</b> | <b>KNN_K1</b> | <b>99</b> | <b>0.741</b> | <b>0.005</b> | <b>0.740</b> | <b>0.741</b> | <b>0.738</b> | <b>0.952</b> |
|            | 0        | KNN_K3        | 90        | 0.713        | 0.009        | 0.705        | 0.713        | 0.703        | 0.963        |
|            | 0        | KNN_K5        | 95        | 0.701        | 0.013        | 0.683        | 0.701        | 0.684        | 0.966        |
|            | 0        | KNN_K7        | 55        | 0.691        | 0.016        | 0.667        | 0.691        | 0.67         | 0.966        |
|            | 1        | KNN_K10       | 21        | 0.676        | 0.018        | 0.640        | 0.676        | 0.649        | 0.967        |
|            | 0        | J48           | 88        | 0.744        | 0.006        | 0.732        | 0.744        | 0.733        | 0.937        |
|            |          |               |           |              |              |              |              |              |              |
| <b>2</b>   | 0        | Naïve Bayes   | 89        | 0.491        | 0.004        | 0.671        | 0.491        | 0.523        | 0.928        |
|            | <b>1</b> | <b>KNN_K1</b> | <b>98</b> | <b>0.741</b> | <b>0.005</b> | <b>0.739</b> | <b>0.741</b> | <b>0.738</b> | <b>0.952</b> |
|            | 0        | KNN_K3        | 90        | 0.713        | 0.009        | 0.706        | 0.713        | 0.703        | 0.963        |
|            | 0        | KNN_K5        | 48        | 0.701        | 0.012        | 0.683        | 0.701        | 0.685        | 0.965        |
|            | 0        | KNN_K7        | 55        | 0.691        | 0.016        | 0.667        | 0.691        | 0.67         | 0.966        |
|            | 1        | KNN_K10       | 22        | 0.676        | 0.018        | 0.640        | 0.676        | 0.649        | 0.967        |
|            | 0        | J48           | 61        | 0.741        | 0.006        | 0.729        | 0.741        | 0.729        | 0.937        |
|            |          |               |           |              |              |              |              |              |              |
| <b>3</b>   | 0        | Naïve Bayes   | 97        | 0.507        | 0.005        | 0.672        | 0.507        | 0.534        | 0.929        |
|            | <b>1</b> | <b>KNN_K1</b> | <b>38</b> | <b>0.741</b> | <b>0.005</b> | <b>0.739</b> | <b>0.741</b> | <b>0.738</b> | <b>0.953</b> |
|            | 0        | KNN_K3        | 100       | 0.718        | 0.009        | 0.712        | 0.718        | 0.709        | 0.963        |
|            | 1        | KNN_K5        | 100       | 0.711        | 0.013        | 0.697        | 0.711        | 0.696        | 0.966        |
|            | 1        | KNN_K7        | 96        | 0.702        | 0.016        | 0.683        | 0.702        | 0.682        | 0.966        |
|            | 1        | KNN_K10       | 81        | 0.691        | 0.022        | 0.664        | 0.691        | 0.664        | 0.966        |
|            | 0        | J48           | 88        | 0.738        | 0.006        | 0.728        | 0.738        | 0.727        | 0.934        |
|            |          |               |           |              |              |              |              |              |              |

**Table S8 - Statistics of Descriptive multiclass experiment best result.**

Best result of Descriptive multiclass experiment (KNN\_K1 with 38 features and configuration 3 in which both n-grams and stemmer were used). This table provides the mean, standard deviation, median and total of instances for all classes and for classes that represent control and change set. The last column shows the number of classes in general and separated by control and change set. The statistics are divided in modeled (classes that have  $F_1 > 0.5$ ) and unmodeled (classes that have  $F_1 \leq 0.5$ ).

|           | Class   | Mean  | Standard deviation | Median | Total of instances | Number of classes |
|-----------|---------|-------|--------------------|--------|--------------------|-------------------|
| Modeled   | All     | 183.1 | 1155.8             | 37     | 63,540             | 347               |
|           | Control | 292.6 | 2119.7             | 34     | 28,972             | 99                |
|           | Change  | 139.4 | 286.3              | 37     | 34,568             | 248               |
| Unmodeled | All     | 61.2  | 123.6              | 23     | 19,414             | 317               |
|           | Control | 36.1  | 48.4               | 27     | 2,059              | 57                |
|           | Change  | 66.8  | 134.0              | 21     | 17,355             | 260               |



**Table S11 - Predictive experiment: multiclass with train and test data.**

The last release in which a certain type of EC change occurs is used as test data and previous releases are used as train data.

| Technique   | Votes    | Maximum    | Features   | TPR          | FPR          | Precision    | Recall       | $F_1$        | AUC          |
|-------------|----------|------------|------------|--------------|--------------|--------------|--------------|--------------|--------------|
| Naïve Bayes | 0        | TPR        | 100        | 0.201        | 0.064        | 0.320        | 0.201        | 0.214        | 0.699        |
|             | 0        | FPR        | 92         | 0.176        | 0.066        | 0.323        | 0.176        | 0.184        | 0.698        |
|             | 0        | Precision  | 53         | 0.150        | 0.019        | 0.387        | 0.150        | 0.191        | 0.685        |
|             | 0        | Recall     | 100        | 0.201        | 0.064        | 0.320        | 0.201        | 0.214        | 0.699        |
|             | <b>1</b> | $F_1$      | <b>65</b>  | <b>0.200</b> | <b>0.039</b> | <b>0.344</b> | <b>0.200</b> | <b>0.236</b> | <b>0.692</b> |
|             | 1        | AUC        | 74         | 0.184        | 0.056        | 0.328        | 0.184        | 0.208        | 0.704        |
|             |          |            |            |              |              |              |              |              |              |
| KNN_K1      | 0        | TPR        | 34         | 0.318        | 0.089        | 0.338        | 0.318        | 0.236        | 0.646        |
|             | 0        | FPR        | 22         | 0.314        | 0.102        | 0.387        | 0.314        | 0.225        | 0.639        |
|             | 0        | Precision  | 1          | 0.239        | 0.013        | 0.564        | 0.239        | 0.243        | 0.657        |
|             | 0        | Recall     | 34         | 0.318        | 0.089        | 0.338        | 0.318        | 0.236        | 0.646        |
|             | <b>1</b> | $F_1$      | <b>13</b>  | <b>0.316</b> | <b>0.075</b> | <b>0.406</b> | <b>0.316</b> | <b>0.247</b> | <b>0.652</b> |
|             | 1        | AUC        | 60         | 0.316        | 0.085        | 0.399        | 0.316        | 0.240        | 0.663        |
|             |          |            |            |              |              |              |              |              |              |
| KNN_K3      | 1        | TPR        | 57         | 0.301        | 0.084        | 0.488        | 0.301        | 0.242        | 0.634        |
|             | 0        | FPR        | 25         | 0.282        | 0.105        | 0.287        | 0.282        | 0.204        | 0.611        |
|             | 0        | Precision  | 54         | 0.298        | 0.077        | 0.498        | 0.298        | 0.241        | 0.649        |
|             | 1        | Recall     | 57         | 0.301        | 0.084        | 0.488        | 0.301        | 0.242        | 0.634        |
|             | 1        | $F_1$      | 57         | 0.301        | 0.084        | 0.488        | 0.301        | 0.242        | 0.634        |
|             | <b>1</b> | <b>AUC</b> | <b>12</b>  | <b>0.283</b> | <b>0.066</b> | <b>0.399</b> | <b>0.283</b> | <b>0.232</b> | <b>0.657</b> |
|             |          |            |            |              |              |              |              |              |              |
| KNN_K5      | 0        | TPR        | 17         | 0.283        | 0.088        | 0.386        | 0.283        | 0.213        | 0.622        |
|             | 0        | FPR        | 28         | 0.269        | 0.112        | 0.199        | 0.269        | 0.194        | 0.624        |
|             | 0        | Precision  | 93         | 0.267        | 0.081        | 0.506        | 0.267        | 0.220        | 0.643        |
|             | 0        | Recall     | 17         | 0.283        | 0.088        | 0.386        | 0.283        | 0.213        | 0.622        |
|             | <b>1</b> | $F_1$      | <b>57</b>  | <b>0.282</b> | <b>0.086</b> | <b>0.502</b> | <b>0.282</b> | <b>0.231</b> | <b>0.635</b> |
|             | 1        | AUC        | 75         | 0.269        | 0.076        | 0.449        | 0.269        | 0.226        | 0.657        |
|             |          |            |            |              |              |              |              |              |              |
| KNN_K7      | 0        | TPR        | 56         | 0.272        | 0.090        | 0.503        | 0.272        | 0.218        | 0.641        |
|             | 0        | FPR        | 26         | 0.259        | 0.114        | 0.202        | 0.259        | 0.184        | 0.629        |
|             | 0        | Precision  | 91         | 0.260        | 0.077        | 0.510        | 0.260        | 0.216        | 0.650        |
|             | 0        | Recall     | 56         | 0.272        | 0.090        | 0.503        | 0.272        | 0.218        | 0.641        |
|             | <b>2</b> | $F_1$      | <b>13</b>  | <b>0.260</b> | <b>0.049</b> | <b>0.238</b> | <b>0.260</b> | <b>0.225</b> | <b>0.671</b> |
|             | 2        | AUC        | 13         | 0.260        | 0.049        | 0.238        | 0.260        | 0.225        | 0.671        |
|             |          |            |            |              |              |              |              |              |              |
| KNN_K10     | <b>2</b> | <b>TPR</b> | <b>100</b> | <b>0.270</b> | <b>0.085</b> | <b>0.497</b> | <b>0.270</b> | <b>0.225</b> | <b>0.666</b> |
|             | 0        | FPR        | 26         | 0.251        | 0.107        | 0.201        | 0.251        | 0.182        | 0.637        |
|             | 0        | Precision  | 69         | 0.257        | 0.079        | 0.515        | 0.257        | 0.212        | 0.647        |
|             | 2        | Recall     | 100        | 0.270        | 0.085        | 0.497        | 0.270        | 0.225        | 0.666        |
|             | 2        | $F_1$      | 100        | 0.270        | 0.085        | 0.497        | 0.270        | 0.225        | 0.666        |
|             | 2        | AUC        | 100        | 0.270        | 0.085        | 0.497        | 0.270        | 0.225        | 0.666        |
|             |          |            |            |              |              |              |              |              |              |
| J48         | 0        | TPR        | 90         | 0.310        | 0.079        | 0.383        | 0.310        | 0.254        | 0.607        |
|             | 0        | FPR        | 32         | 0.300        | 0.115        | 0.301        | 0.300        | 0.219        | 0.669        |
|             | 0        | Precision  | 44         | 0.302        | 0.073        | 0.688        | 0.302        | 0.248        | 0.621        |
|             | 0        | Recall     | 90         | 0.310        | 0.079        | 0.383        | 0.310        | 0.254        | 0.607        |
|             | 1        | $F_1$      | 46         | 0.299        | 0.052        | 0.418        | 0.299        | 0.255        | 0.638        |
|             | <b>1</b> | <b>AUC</b> | <b>16</b>  | <b>0.296</b> | <b>0.084</b> | <b>0.249</b> | <b>0.296</b> | <b>0.221</b> | <b>0.692</b> |

**Table S12 - Predictive multiclass experiment with train and test data: best performance of EC change prediction for each classification algorithm.**

| Number of Votes | Algorithm     | Number of Features | TPR          | FPR          | Precision    | Recall       | $F_1$        | AUC          |
|-----------------|---------------|--------------------|--------------|--------------|--------------|--------------|--------------|--------------|
| 1               | Naive Bayes   | 65                 | 0.200        | 0.039        | 0.344        | 0.200        | 0.236        | 0.692        |
| <b>1</b>        | <b>KNN_K1</b> | <b>13</b>          | <b>0.316</b> | <b>0.075</b> | <b>0.406</b> | <b>0.316</b> | <b>0.247</b> | <b>0.652</b> |
| 0               | KNN_K3        | 12                 | 0.283        | 0.066        | 0.399        | 0.283        | 0.232        | 0.657        |
| 0               | KNN_K5        | 57                 | 0.282        | 0.086        | 0.502        | 0.282        | 0.231        | 0.635        |
| 0               | KNN_K7        | 13                 | 0.260        | 0.049        | 0.238        | 0.260        | 0.225        | 0.671        |
| 0               | KNN_K10       | 100                | 0.270        | 0.085        | 0.497        | 0.270        | 0.225        | 0.666        |
| 1               | J48           | 16                 | 0.296        | 0.084        | 0.249        | 0.296        | 0.221        | 0.692        |

**Table S13 - Arithmetic and weighted mean for the best result of predictive multiclass experiment (KNN\_K1 with 13 features).**

The means were calculated separately for classes that represent EC changes (Change Set) and non changes (Control Set).

| Metrics   | Control Set     |               | Change Set      |               |
|-----------|-----------------|---------------|-----------------|---------------|
|           | Arithmetic Mean | Weighted Mean | Arithmetic Mean | Weighted Mean |
| TPR       | 0.515           | 0.828         | 0.092           | 0.255         |
| FPR       | 0.016           | 0.229         | 0.001           | 0.002         |
| Precision | 0.585           | 0.524         | 0.114           | 0.269         |
| Recall    | 0.515           | 0.828         | 0.092           | 0.255         |
| $F_1$     | 0.512           | 0.605         | 0.078           | 0.188         |
| AUC       | 0.804           | 0.826         | 0.641           | 0.721         |

**Table S14 - Arithmetic and weighted mean for the best result of common source experiment with Swiss-Prot test data.**

The means were calculated separately for classes that represent EC changes (Change Set) and non changes (Control Set).

| Metrics   | Control Set     |               | Change Set      |               |
|-----------|-----------------|---------------|-----------------|---------------|
|           | Arithmetic Mean | Weighted Mean | Arithmetic Mean | Weighted Mean |
| TPR       | 0.881           | 0.908         | 0.269           | 0.274         |
| FPR       | 0.287           | 0.301         | 0.038           | 0.070         |
| Precision | 0.855           | 0.741         | 0.287           | 0.756         |
| Recall    | 0.881           | 0.908         | 0.269           | 0.274         |
| $F_1$     | 0.859           | 0.806         | 0.249           | 0.293         |
| AUC       | 0.812           | 0.825         | 0.687           | 0.643         |

**Table S15 - Arithmetic and weighted mean for the best result of common source experiment with TrEMBL test data.**

The means were calculated separately for classes that represent EC changes (Change Set) and non changes (Control Set).

| Metrics   | Control Set     |               | Change Set      |               |
|-----------|-----------------|---------------|-----------------|---------------|
|           | Arithmetic Mean | Weighted Mean | Arithmetic Mean | Weighted Mean |
| TPR       | 0.778           | 0.648         | 0.229           | 0.773         |
| FPR       | 0.525           | 0.338         | 0.091           | 0.227         |
| Precision | 0.888           | 0.680         | 0.218           | 0.903         |
| Recall    | 0.778           | 0.648         | 0.229           | 0.773         |
| $F_1$     | 0.803           | 0.649         | 0.221           | 0.829         |
| AUC       | 0.647           | 0.666         | 0.609           | 0.826         |

**Table S16 - Fragment of table generated to study KW and EC number changes.**

This is a fragment of a table with 18,727,155 lines, each one representing an observation of EC number and KW line type changes and non-changes for the 44 UniProt/Swiss-Prot releases studied in pairs. The 44 releases of UniProt/Swiss-Prot were analyzed to check if changes in KW line type occur at the same time as changes in EC number annotation. Column *EC Change* has value 1 if the EC number of the correspondent entry changed in the specific release pair and this column has value 0 otherwise. The same applies to *KW Change* column. The whole table is available in the ENZYMAP website.

| Id     | Release Pair | Old EC   | New EC   | EC Change | KW Change |
|--------|--------------|----------|----------|-----------|-----------|
| P47997 | 1-2          | 2.7.1.-  | 2.7.1.-  | 0         | 0         |
| Q09815 | 1-2          | 2.7.1.-  | 2.7.1.37 | 1         | 0         |
| Q479B1 | 14-15        | 1.4.99.1 | 1.4.99.1 | 0         | 0         |
| A5VHH9 | 14-15        | -.-.-    | 2.1.1.-  | 1         | 1         |
| B7NFT7 | 43-44        | 3.6.1.22 | 3.6.1.22 | 0         | 0         |
| C6A2P7 | 43-44        | -.-.-    | 2.7.7.77 | 1         | 1         |

**Table S17 - Comparison of changes in KW line type and EC number.**

Results of changes in KW and EC number. An example of the data generated to perform this analysis is provided in Table S16. Column  $EC=KW=0$  represents instances in which EC number and KW did not change; column  $EC=KW=1$  refers to instances in which EC number and KW changed at the same time; column  $EC=KW$  shows instances in which EC and KW changed at the same time or both stayed the same and column  $EC \neq KW$  represents instances whose EC and KW changed separately (one of them is 0 and the other is 1). In the row *Percentage over the dataset* the absolute values from each column is divided by the number of instances of the reference dataset, while in the row *Percentage over changes or non-changes* values are divide by half of the number of instances from the reference dataset. In (a), KW is used as reference, so all instances (1,074,763) in which KW line type changed were collected and a random sample of the same size was generated from instances in which KW did not change. In (b), EC is used as reference, so all instances (55,908) in which EC number changed were collected and a random sample of the same size was generated from instances in which EC number did not change.

| Percentage                  | EC=KW=0 | EC=KW=1 | EC=KW | EC≠KW |
|-----------------------------|---------|---------|-------|-------|
| (a) Over the dataset        | 0.499   | 0.012   | 0.511 | 0.489 |
| Over changes or non-changes | 0.998   | 0.024   | -     | -     |

| Percentage                  | EC=KW=0 | EC=KW=1 | EC=KW | EC≠KW |
|-----------------------------|---------|---------|-------|-------|
| (b) Over the dataset        | 0.472   | 0.232   | 0.704 | 0.296 |
| Over changes or non-changes | 0.944   | 0.464   | -     | -     |

**Table S18 - OC, RP and KW used separately.**

The Descriptive multiclass experiment with OC, RP and KW used separately aimed to show the individual contribution of line types OC, RP and KW to discriminate entries that underwent a specific change in the EC number from those in which the EC annotation remained the same. The methodology is the same used in the Descriptive Multiclass Experiment, the only difference is that three classification models were generated from three data matrices, one for each line type.

Table S18 provides the best results for each line type. The complete results are in the Supporting material S1, Table S10, which shows the best result for each classification algorithm. The line type RP is slightly better than OC to characterize changes in EC annotation and KW outperforms OC and RP. KW is potentially good to characterize EC changes as it is a controlled vocabulary which summarises the content of an entry. KW is automatically assigned in TrEMBL and manually verified in Swiss-Prot manual curation process. Also, we conducted an experiment using the complete dataset (44 releases of UniProt/Swiss-Prot) to assess whether changes in EC number annotation and KW line type occur at the same time and we concluded that although there is some correlation between EC and KW changes, for a significant amount of data they vary separately: when EC is used as reference, KW only changes simultaneously for 23% of the instances, whereas when KW is used as reference, EC changes concomitantly for only 1%. This finding strongly indicates that KW and EC changes are not always coupled. This experiment and its results are detailed in Supporting material S1, Figure S6 and Tables S16 and S17.

Results showed in Table S18 provide evidence that some UniProt line types are better than others to characterize EC number changes. Moreover, it is important to point out that the multiclass classifier with 664 classes based on KW was able to identify consistent recurring patterns in the training data as its results (0.76 for  $F_1$ ) are much better than expected at random (the probability of correctly predicting a class at random is 1/664 or 0.15%)

| Descriptive experiment | Algorithm | # of features | FPR   | Prec. | Rec.  | $F_1$ | AUC   |
|------------------------|-----------|---------------|-------|-------|-------|-------|-------|
| OC                     | KNN_K1    | 64            | 0.208 | 0.139 | 0.275 | 0.146 | 0.777 |
| RP                     | KNN_K1    | 64            | 0.220 | 0.167 | 0.277 | 0.146 | 0.733 |
| KW                     | KNN_K1    | 80            | 0.012 | 0.767 | 0.787 | 0.760 | 0.990 |
